# Supplementary material
Source: MDPI journal article supplement (https://www.mdpi.com/2075-4442/6/1/24)
Supplement: s1 [file s1]

Supplementary Materials

# A Preliminary Study to Enhance the Tribological Performance of CoCrMo Alloy by Fibre Laser Remelting for Articular Joint Implant Applications

Chi-Wai Chan <sup>1,\*</sup>, Graham C. Smith <sup>2</sup> and Seunghwan Lee <sup>3</sup>

<sup>1</sup> Bioengineering Research Group, School of Mechanical and Aerospace Engineering, Queen's University Belfast, Belfast BT9 5AH, U.K.

<sup>2</sup> Department of Natural Sciences, University of Chester, Thornton Science Park, Chester CH2 4NU, U.K.; graham.smith@chester.ac.uk

<sup>3</sup> Department of Mechanical Engineering, Technical University of Denmark, DK-2800 Kgs. Lyngby, Denmark; seele@mek.dtu.dk

\* Correspondence: c.w.chan@qub.ac.uk

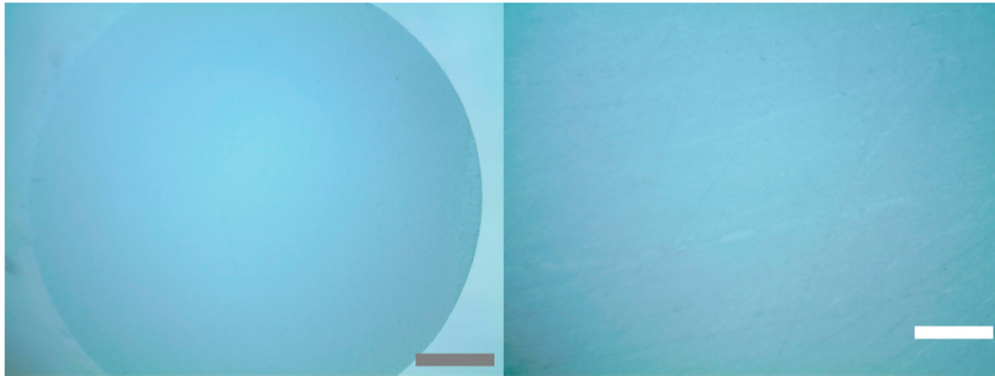

**Figure S1.** Optical microscopic images of UHMWPE pin (left) and disc (right) before tribological tests. The scale bars represent 1 mm.
